# Supplementary material for: Short-Term Changes in Anemia and Malaria Parasite Prevalence in Children under 5 Years during One Year of Repeated Cross-Sectional Surveys in Rural Malawi
Source: PubMed Central journal article supplement (PMC5817775; doi:10.4269/ajtmh.17-0335), 2017-08-07
Supplement: tpmd170335.SD1.pdf [file tpmd170335.SD1.pdf]

SUPPLEMENTAL TABLE 1  
 Estimates and 95% confidence interval for predictors of hemoglobin level

|                        | Factor   | Estimate | Lower confidence interval | Upper confidence interval |
|------------------------|----------|----------|---------------------------|---------------------------|
| mRDT result            | Negative | Ref      | -                         | -                         |
|                        | Positive | -0.92103 | -1.14422                  | -0.69785                  |
| Age category in months | 6-12     | Ref      | -                         | -                         |
|                        | 12-24    | 0.63563  | 0.27234                   | 0.99893                   |
|                        | 24-36    | 1.02236  | 0.66417                   | 1.38055                   |
|                        | 36-48    | 0.78234  | 0.40846                   | 1.15622                   |
|                        | 48-60    | 1.25521  | 0.88738                   | 1.62304                   |
| Stunting               | HAZ > -2 | Ref      | -                         | -                         |
|                        | HAZ < -2 | -0.25948 | -0.46048                  | -0.05847                  |
| Wasting                | WHZ > -2 | Ref      | -                         | -                         |
|                        | WHZ < -2 | -0.07593 | -0.32339                  | 0.17152                   |
